# Supplementary material
Source: MDPI journal article supplement (https://www.mdpi.com/2072-4292/6/8/6844)
Supplement: s1 [file s1]

**OPEN ACCESS**

remote sensing

**ISSN 2072-4292**

www.mdpi.com/journal/remotesensing

Supplementary Information

Application of DMSP/OLS Nighttime Light Images:
A Meta-Analysis and a Systematic Literature Review. *Remote Sens.* 2014, *6*, 6844-6866

Qingxu Huang 1,*, Xi Yang 2,3,†, Bin Gao 1,†, Yang Yang 4,† and Yuanyuan Zhao 5,†

1 State Key Laboratory of Earth Surface Processes and Resource Ecology, Beijing Normal University, 19 Xinjiekouwai Street, Beijng 100875, China; E-Mail: bing0402@126.com

2 Department of Geological Sciences, Brown University, Providence, RI 02912, USA;
E-Mails: Xi_Yang@Brown.edu

3 The Ecosystems Center, Marine Biological Laboratory, Woods Hole, MA 02543, USA

4 School of Law and Political Science, Ocean University of China, Qingdao 266100, China;
E-Mail: yang_ouc@163.com

5 Key Laboratory of Soil and Water Conservation and Desertification Combating,; School of Soil and Water Conservation, Beijing Forestry University,
Beijing 100083, China; E-Mail: yuanyuan0402@126.com

**†** These authors contributed equally to this work.

***** Author to whom correspondence should be addressed; E-Mail: qxhuang@bnu.edu.cn;
Tel.: +86-01-5880-4921; Fax: +86-01-5880-8661.

This supplementary material supports the main text as follows:

**Paper List**

1. Agnew, J.; Gillespie, T.W.; Gonzalez, J.; Min, B. Baghdad nights: Evaluating the US military “surge”using nighttime light signatures. *Environ. Plan. A* **2008**, *40*, 2285–2295.
2. Álvarez-Berríos, N.; Parés-Ramos, I.; Aide, T.M. Contrasting patterns of urban expansion in colombia, ecuador, peru, and bolivia between 1992 and 2009. *Ambio* **2013**, *42*, 29–40.
3. Amaral, S.; Câmara, G.; Monteiro, A.M.V.; Quintanilha, J.A.; Elvidge, C.D. Estimating population and energy consumption in Brazilian Amazonia using DMSP night-time satellite data. *Comput. Environ. Urban Syst.* **2005**, *29*, 179–195.
4. Amaral, S.; Monteiro, A.M.V.; Camara, G.; Quintanilha, J.A. DMSP/OLS night-time light imagery for urban population estimates in the Brazilian Amazon. *Int. J. Remote Sens.* **2006**, *27*, 855–870.
5. Anderson, S.J.; Tuttle, B.T.; Powell, R.L.; Sutton, P.C. Characterizing relationships between population density and nighttime imagery for denver, colorado: Issues of scale and representation. *Int. J. Remote Sens.* **2010**, *31*, 5733–5746.
6. Aubrecht, C.; Elvidge, C.D.; Longcore, T.; Rich, C.; Safran, J.; Strong, A.E.; Eakin, C.M.; Baugh, K.E.; Tuttle, B.T.; Howard, A.T.; *et al.* A global inventory of coral reef stressors based on satellite observed nighttime lights. *Geocarto Int.* **2008**, *23*, 467–479.
7. Badarinath, K.V.S.; Kharol, S. Studies on aerosol properties during ICARB-2006 campaign period at Hyderabad, India using ground-based measurements and satellite data. *J. Earth Syst. Sci.* **2008**, *117*, 413–420.
8. Badarinath, K.V.S.; Kharol, S.K.; Latha, K.M.; Chand, T.R.K.; Prasad, V.K.; Jyothsna, A.N.; Samatha, K. Multiyear ground-based and satellite observations of aerosol properties over a tropical urban area in India. *Atmos. Sci. Lett.* **2007**, *8*, 7–13.
9. Badarinath, K.V.S.; Kumar Kharol, S.; Kiran Chand, T.R.; Parvathi, Y.G.; Anasuya, T.;
   Jyothsna, A.N. Variations in black carbon aerosol, carbon monoxide and ozone over an urban area of Hyderabad, India, during the forest fire season. *Atmos. Res.* **2007**, *85*, 18–26.
10. Badarinath, K.V.S.; Kumar Kharol, S.; Krishna Prasad, V.; Rani Sharma, A.; Reddi, E.U.B.; Kambezidis, H.D.; Kaskaoutis, D.G. Influence of natural and anthropogenic activities on UV index variations—A study over tropical urban region using ground based observations and satellite data. *J. Atmos. Chem.* **2008**, *59*, 219–236.
11. Badarinath, K.V.S.; Sharma, A.; Kharol, S.; Prasad, V.K. Variations in CO, O3 and black carbon aerosol mass concentrations associated with Planetary Boundary Layer (PBL) over tropical urban environment in India. *J. Atmos. Chem.* **2009**, *62*, 73–86.
12. Badarinath, K.V.S.; Sharma, A.R.; Kharol, S.K. Forest fire monitoring and burnt area mapping using satellite data: A study over the forest region of Kerala state, India. *Int. J. Remote Sens.* **2011**, *32*, 85–102.
13. Bankert, R.L.; Solbrig, J.E.; Lee, T.F.; Miller, S.D. Automated lightning flash detection in nighttime visible satellite data. *Weather Forecast.* **2011**, *26*, 399–408.
14. Bauer, S.; Wagner, S.; Burch, J.; Bayakly, R.; Vena, J. A case-referent study: Light at night and breast cancer risk in Georgia. *Int. J. Health Geogr.* **2013**, *12*, 23.
15. Bharti, N.; Tatem, A.J.; Ferrari, M.J.; Grais, R.F.; Djibo, A.; Grenfell, B.T. Explaining seasonal fluctuations of measles in Niger using nighttime lights imagery. Science **2011**, *334*, 1424–1427.
16. Briggs, D.J.; Gulliver, J.; Fecht, D.; Vienneau, D.M. Dasymetric modelling of small-area population distribution using land cover and light emissions data. *Remote Sens. Environ.* **2007**, *108*, 451–466.
17. Butt, M. Estimation of light pollution using satellite remote sensing and geographic information system techniques. *GISci. Remote Sens.* **2012**, *49*, 609–621.
18. Cao, X.; Chen, J.; Imura, H.; Higashi, O. A SVM-based method to extract urban areas from DMSP-OLS and spot VGT data. *Remote Sens. Environ.* **2009**, *113*, 2205–2209.
19. Casadio, S.; Arino, O.; Serpe, D. Gas flaring monitoring from space using the ATSR instrument series. *Remote Sens. Environ.* **2012**, *116*, 239–249.
20. Chand, T.R.K.; Badarinath, K.V.S.; Elvidge, C.D.; Tuttle, B.T. Spatial characterization of electrical power consumption patterns over India using temporal DMSP-OLS night-time satellite data. *Int. J. Remote Sens.* **2009**, *30*, 647–661.
21. Chand, T.R.K.; Badarinath, K.V.S.; Murthy, M.S.R.; Rajshekhar, G.; Elvidge, C.D.; Tuttle, B.T. Active forest fire monitoring in Uttaranchal state, India using multi-temporal DMSP-OLS and MODIS data. *Int. J. Remote Sens.* **2007**, *28*, 2123–2132.
22. Chen, B.; Shi, G.; Wang, B.; Zhao, J.; Tan, S. Estimation of the anthropogenic heat release distribution in China from 1992 to 2009. *Acta Meteorol. Sin.* **2012**, *26*, 507–515.
23. Chen, X.; Nordhaus, W.D. Using luminosity data as a proxy for economic statistics. *Proc. Natl. Acad. Sci. USA* **2011**, *108*, 8589–8594.
24. Cho, K.; Ito, R.; Shimoda, H.; Sakata, T. Technical note and cover fishing fleet lights and
    sea surface temperature distribution observed by DMSP/OLS sensor. *Int. J. Remote Sens.* **1999**, *20*, 3–9.
25. Choi, K.; Lee, C.I.; Hwang, K.; Kim, S.-W.; Park, J.-H.; Gong, Y. Distribution and migration of Japanese common squid, Todarodes Pacificus, in the southwestern part of the East (Japan) sea. *Fish. Res.* **2008**, *91*, 281–290.
26. Cinzano, P.; Elvidge, C.D. Night sky brightness at sites from DMSP-OLS satellite measurements. *Mon. Not. R. Astron. Soc.* **2004**, *353*, 1107–1116.
27. Cinzano, P.; Falchi, F. The propagation of light pollution in the atmosphere. *Mon. Not. R.
    Astron. Soc.* **2012**, *427*, 3337–3357.
28. Cinzano, P.; Falchi, F.; Elvidge, C.D. The first world atlas of the artificial night sky brightness. *Mon. Not. R. Astron. Soc.* **2001**, *328*, 689–707.
29. Cinzano, P.; Falchi, F.; Elvidge, C.D. Naked-eye star visibility and limiting magnitude mapped from DMSP-OLS satellite data. *Mon. Not. R. Astron. Soc.* **2001**, *323*, 34–46.
30. Cinzano, P.; Falchi, F.; Elvidge, C.D.; Baugh, K.E. The artificial night sky brightness mapped from DMSP satellite operational linescan system measurements. *Mon. Not. R. Astron. Soc.* **2000**, *318*, 641–657.
31. Cova, T.J.; Sutton, P.C.; Theobald, D.M. Exurban change detection in fire-prone areas with nighttime satellite imagery. *Photogramm. Eng. Remote Sens.* **2004**, *70*, 1249–1257.
32. Decker, E.H.; Kerkhoff, A.J.; Moses, M.E. Global patterns of city size distributions and their fundamental drivers. *PLoS One* **2007**, *2*, e934.
33. Dobson, J.E.; Brlght, E.A.; Coleman, P.R.; Durfee, R.C.; Worley, B.A. Landscan: A global population database for estimating populations at risk. *Photogramm. Eng. Remote Sens.* **2000**, *66*, 849–857.
34. Doll, C.N.H.; Muller, J.-P.; Elvidge, C.D. Night-time imagery as a tool for global mapping of socioeconomic parameters and greenhouse gas emissions. *Ambio* **2000**, *29*, 157–162.
35. Doll, C.N.H.; Muller, J.-P.; Morley, J.G. Mapping regional economic activity from night-time light satellite imagery. *Ecol. Econ.* **2006**, *57*, 75–92.
36. Doll, C.N.H.; Pachauri, S. Estimating rural populations without access to electricity in developing countries through night-time light satellite imagery. *Energy Policy* **2010**, *38*, 5661–5670.
37. Dorélien, A.; Balk, D.; Todd, M. What is urban? Comparing a satellite view with the demographic and health surveys. *Popul. Dev. Rev.* **2013**, *39*, 413–439.
38. Du, Y.; Xie, Z.; Zeng, Y.; Shi, Y.; Wu, J. Impact of urban expansion on regional temperature change in the yangtze river delta. *J. Geogr. Sci.* **2007**, *17*, 387–398.
39. Dwyer, R.G.; Bearhop, S.; Campbell, H.A.; Bryant, D.M. Shedding light on light: Benefits of anthropogenic illumination to a nocturnally foraging shorebird. *J. Anim. Ecol.* **2013**, *82*, 478–485.
40. Ebener, S.; Murray, C.; Tandon, A.; Elvidge, C. From wealth to health: Modelling the distribution of income per capita at the sub-national level using night-time light imagery. *Int. J. Health Geogr.* **2005**, *4*, doi:10.1186/1476-072X-4-5.
41. Elvidge, C.; Baugh, K.; Hobson, V.; Kihn, E.; Kroehl, H.; Davis, E.; Cocero, D. Satellite inventory of human settlements using nocturnal radiation emissions: A contribution for the global toolchest. *Glob. Chang. Biol.* **1997**, *3*, 387–395.
42. Elvidge, C.; Ziskin, D.; Baugh, K.; Tuttle, B.; Ghosh, T.; Pack, D.; Erwin, E.; Zhizhin, M. A fifteen year record of global natural gas flaring derived from satellite data. *Energies* **2009**, *2*, 595–622.
43. Elvidge, C.D.; Baugh, K.E.; Dietz, J.B.; Bland, T.; Sutton, P.C.; Kroehl, H.W. Radiance calibration of DMSP-OLS low-light imaging data of human settlements. *Remote Sens. Environ.* **1999**, *68*, 77–88.
44. Elvidge, C.D.; Baugh, K.E.; Kihn, E.A.; Kroehl, H.W.; Davis, E.R. Mapping city lights with nighttime data from the DMSP operational linescan system. *Photogramm. Eng. Remote Sens.* **1997**, *63*, 727–734.
45. Elvidge, C.D.; Baugh, K.E.; Kihn, E.A.; Kroehl, H.W.; Davis, E.R.; Davis, C.W. Relation between satellite observed visible-near infrared emissions, population, economic activity and electric power consumption. *Int. J. Remote Sens.* **1997**, *18*, 1373–1379.
46. Elvidge, C.D.; Cinzano, P.; Pettit, D.R.; Arvesen, J.; Sutton, P.; Small, C.; Nemani, R.; Longcore, T.; Rich, C.; Safran, J.; *et al.* The nightsat mission concept. *Int. J. Remote Sens.* **2007**, *28*, 2645–2670.
47. Elvidge, C.D.; Hobson, V.R.; Baugh, K.E.; Dietz, J.B.; Shimabukuro, Y.E.; Krug, T.;
    Novo, E.M.L.M.; Echavarria, F.R. DMSP-OLS estimation of tropical forest area impacted by surface fires in Roraima, Brazil: 1995 *versus* 1998. *Int. J. Remote Sens.* **2001**, *22*, 2661–2673.
48. Elvidge, C.D.; Imhoff, M.L.; Baugh, K.E.; Hobson, V.R.; Nelson, I.; Safran, J.; Dietz, J.B.;
    Tuttle, B.T. Night-time lights of the world: 1994–1995. *ISPRS J. Photogramm. Remote Sens.* **2001**, *56*, 81–99.
49. Elvidge, C.D.; Sutton, P.C.; Ghosh, T.; Tuttle, B.T.; Baugh, K.E.; Bhaduri, B.; Bright, E. A global poverty map derived from satellite data. *Comput. Geosci.* **2009**, *35*, 1652–1660.
50. Filho, C.R.D.S.; Zullo J., Jr.; Elvidge, C. Brazil’s 2001 energy crisis monitored from space. *Int. J. Remote Sens.* **2004**, *25*, 2475–2482.
51. Forbes, D.J. Multi-scale analysis of the relationship between economic statistics and DMSP-OLS night light images. *GISci. Remote Sens.* **2013**, *50*, 483–499.
52. Frolking, S.; Milliman, T.; Seto, K.C.; Friedl, M.A. A global fingerprint of macro-scale changes in urban structure from 1999 to 2009. *Environ. Res. Lett.* **2013**, *8*, doi: 10.1088/1748-9326/8/2/024004.
53. Fuller, D.O. Satellite remote sensing of biomass burning with optical and thermal sensors.
    *Prog. Phys. Geogr.* **2000**, *24*, 543–561.
54. Fuller, D.O.; Fulk, M. Comparison of NOAA-AVHRR and DMSP-OLS for operational fire monitoring in Kalimantan, Indonesia. *Int. J. Remote Sens.* **2000**, *21*, 181–187.
55. Gallo, K.P.; Tarpley, J.D.; McNab, A.L.; Karl, T.R. Assessment of urban heat islands: A satellite perspective. *Atmos. Res.* **1995**, *37*, 37–43.
56. Ghosh, T.; Anderson, S.; Powell, R.L.P.; Sutton, P.; Elvidge, C. Estimation of Mexico’s informal economy and remittances using nighttime imagery. *Remote Sens.* **2009**, *1*, 418–444.
57. Ghosh, T.; Elvidge, C.D.; Sutton, P.C.; Baugh, K.E.; Ziskin, D.; Tuttle, B.T. Creating a global grid of distributed fossil fuel CO2 emissions from nighttime satellite imagery. *Energies* **2010**, *3*, 1895–1913.
58. Greenwald, T.J.; Drummond, C.J. Computing the atmospheric absorption for the DMSP operational linescan system infrared channel. *J. Atmos. Ocean. Technol.* **1999**, *16*, 1958–1966.
59. He, C.; Ma, Q.; Li, T.; Yang, Y.; Liu, Z. Spatiotemporal dynamics of electric power consumption in Chinese mainland from 1995 to 2008 modeled using DMSP/OLS stable nighttime lights data.
    *J. Geogr. Sci.* **2012**, *22*, 125–136.
60. He, C.; Ma, Q.; Liu, Z.; Zhang, Q. Modeling the spatiotemporal dynamics of electric power consumption in mainland China using saturation-corrected DMSP/OLS nighttime stable light data. *Int. J. Digit. Earth* **2013**, doi:10.1080/17538947.2013.822026
61. He, C.; Shi, P.; Li, J.; Chen, J.; Pan, Y.; Li, J.; Zhuo, L.; Ichinose, T. Restoring urbanization process in China in the 1990s by using non-radiance-calibrated DMSP/OLS nighttime light imagery and statistical data. *Chin. Sci. Bull.* **2006**, *51*, 1614–1620.
62. Henderson, M.; Yeh, E.T.; Gong, P.; Elvidge, C.; Baugh, K. Validation of urban boundaries derived from global night-time satellite imagery. *Int. J. Remote Sens.* **2003**, *24*, 595–609.
63. Henderson, V.; Storeygard, A.; Weil, D.N. A bright idea for measuring economic growth.
    *Am. Econ. Rev.* **2011**, *101*, 194–199.
64. Hsu, F.-C.; Elvidge, C.D.; Matsuno, Y. Exploring and estimating in-use steel stocks in civil engineering and buildings from night-time lights. *Int. J. Remote Sens.* **2013**, *34*, 490–504.
65. Imhoff, M.L.; Lawrence, W.T.; Elvidge, C.D.; Paul, T.; Levine, E.; Privalsky, M.V.; Brown, V. Using nighttime DMSP/OLS images of city lights to estimate the impact of urban land use on soil resources in the United States. *Remote Sens. Environ.* **1997**, *59*, 105–117.
66. Imhoff, M.L.; Lawrence, W.T.; Stutzer, D.C.; Elvidge, C.D. A technique for using composite DMSP/OLS “city lights” satellite data to map urban area. *Remote Sens. Environ.* **1997**, *61*, 361–370.
67. Jiang, L.; Deng, X.; Seto, K.C. Multi-level modeling of urban expansion and cultivated land conversion for urban hotspot counties in China. *Landsc. Urban Plan.* **2012**, *108*, 131–139.
68. Joshi, P.; Bairwa, B.M.; Sharma, R.; Sinha, V.S. Assessing urbanization patterns over India using temporal DMSP-OLS night-time satellite data. *Curr. Sci. (Bangalore)* **2011**, *100*, 1479–1482.
69. Kharol, S.; Badarinath, K.V.S. Effect of synoptic meteorological conditions on aerosol properties over urban environment: A study over tropical urban region of Hyderabad, India. *Acta Geophys.* **2007**, *55*, 383–397.
70. Kharol, S.K.; Badarinath, K.V.S. Impact of biomass burning on aerosol properties over tropical urban region of Hyderabad, India. *Geophys. Res. Lett.* **2006**, *33*, L20801.
71. Chand, T.R.K.; Badarinath, K.V.S.; Prasad, V.K.; Murthy, M.S.R.; Elvidge, C.D.; Tuttle, B.T. Monitoring forest fires over the Indian region using defense meteorological satellite program-operational linescan system nighttime satellite data. *Remote Sens. Environ.* **2006**, *103*, 165–178.
72. Kiyofuji, H.; Saitoh, S.-I. Use of nighttime visible images to detect Japanese common squid Todarodes Pacificus fishing areas and potential migration routes in the Sea of Japan. *Mar. Ecol. Prog. Ser.* **2004**, *276*, 173–186.
73. Kohiyama, M.; Hayashi, H.; Maki, N.; Higashida, M.; Kroehl, H.W.; Elvidge, C.D.; Hobson, V.R. Early damaged area estimation system using DMSP-OLS night-time imagery. *Int. J. Remote Sens.* **2004**, *25*, 2015–2036.
74. Kort, E.A.; Frankenberg, C.; Miller, C.E.; Oda, T. Space-based observations of megacity carbon dioxide. *Geophys. Res. Lett.* **2012**, *39*, L17806.
75. Kuang, W. Evaluating impervious surface growth and its impacts on water environment in Beijing-Tianjin-Tangshan metropolitan area. *J. Geogr. Sci.* **2012**, *22*, 535–547.
76. Lawrence, W.T.; Imhoff, M.L.; Kerle, N.; Stutzer, D. Quantifying urban land use and impact on soils in Egypt using diurnal satellite imagery of the earth surface. *Int. J. Remote Sens.* **2002**, *23*, 3921–3937.
77. Letu, H.; Hara, M.; Tana, G.; Nishio, F. A saturated light correction method for DMSP/OLS nighttime satellite imagery. *IEEE Trans. Geosci. Remote Sens.* **2012**, *50*, 389–396.
78. Letu, H.; Hara, M.; Yagi, H.; Naoki, K.; Tana, G.; Nishio, F.; Shuhei, O. Estimating energy consumption from night-time DMPS/OLS imagery after correcting for saturation effects. *Int. J. Remote Sens.* **2010**, *31*, 4443–4458.
79. Levin, N.; Duke, Y. High spatial resolution night-time light images for demographic and socio-economic studies. *Remote Sens. Environ.* **2012**, *119*, 1–10.
80. Li, X.; Chen, F.; Chen, X. Satellite-Observed nighttime light variation as evidence for global armed conflicts. *IEEE J. Sel. Top. Appl. Earth Obs. Remote Sens.* **2013**, *6*, 2302–2315.
81. Li, X.; Chen, X.; Zhao, Y.; Xu, J.; Chen, F.; Li, H. Automatic intercalibration of night-time light imagery using robust regression. *Remote Sens. Lett.* **2013**, *4*, 45–54.
82. Li, X.; Ge, L.; Chen, X. Detecting Zimbabwe’s decadal economic decline using nighttime light imagery. *Remote Sens.* **2013**, *5*, 4551–4570.
83. Liu, Q.; Yang, Y.; Tian, H.; Zhang, B.; Gu, L. Assessment of human impacts on vegetation in built-up areas in China based on AVHRR, MODIS and DMSP_OLS nighttime light data, 1992–2010. *Chin. Geogr. Sci.* **2013**, *24*, 231–244.
84. Liu, Z.; He, C.; Zhang, Q.; Huang, Q.; Yang, Y. Extracting the dynamics of urban expansion in China using DMSP-OLS nighttime light data from 1992 to 2008. *Landsc. Urban Plan.* **2012**, *106*, 62–72.
85. Lo, C.P. Modeling the population of China using DMSP operational linescan system nighttime data. *Photogramm. Eng. Remote Sens.* **2001**, *67*, 1037–1047.
86. Lo, C.P. Urban indicators of China from radiance-calibrated digital DMSP-OLS nighttime images. *Ann. Assoc. Am. Geogr.* **2002**, *92*, 225–240.
87. Lu, D.; Tian, H.; Zhou, G.; Ge, H. Regional mapping of human settlements in southeastern China with multisensor remotely sensed data. *Remote Sens. Environ.* **2008**, *112*, 3668–3679.
88. Lu, D.; Xu, X.; Tian, H.; Moran, E.; Zhao, M.; Running, S. The effects of urbanization on net primary productivity in southeastern China. *Environ. Manag.* **2010**, *46*, 404–410.
89. Ma, T.; Zhou, C.; Pei, T.; Haynie, S.; Fan, J. Quantitative estimation of urbanization dynamics using time series of DMSP/OLS nighttime light data: A comparative case study from China’s cities. *Remote Sens. Environ.* **2012**, *124*, 99–107.
90. Matsuoka, M.; Hayasaka, T.; Fukushima, Y.; Honda, Y. Land cover in east Asia classified using terra MODIS and DMSP OLS products. *Int. J. Remote Sens.* **2007**, *28*, 221–248.
91. Maxwell, M.R.; Henry, A.; Elvidge, C.; Safran, J.; Hobson, V.; Nelson, I.; Tuttle, B.; Dietz, J.; Hunter, J. Fishery dynamics of the California market squid (*Loligo opalescens*), as measured by satellite remote sensing. *Fish. Bull.* **2004**, *102*, 661–670.
92. Milesi, C.; Elvidge, C.D.; Nemani, R.R.; Running, S.W. Assessing the impact of urban land development on net primary productivity in the southeastern United States. *Remote Sens. Environ.* **2003**, *86*, 401–410.
93. Miller, S.D.; Haddock, S.H.D.; Elvidge, C.D.; Lee, T.F. Detection of a bioluminescent milky sea from space. *Proc. Natl. Acad. Sci. USA* **2005**, *102*, 14181–14184.
94. Min, B.; Gaba, K.M.; Sarr, O.F.; Agalassou, A. Detection of rural electrification in Africa using DMSP-OLS night lights imagery. *Int. J. Remote Sens.* **2013**, *34*, 8118–8141.
95. Nizeyimana, E.L.; Petersen, G.W.; Imhoff, M.L.; Sinclair, H.R.; Waltman, S.W.;
    Reed-Margetan, D.S.; Levine, E.R.; Russo, J.M. Assessing the impact of land conversion to urban use on soils with different productivity levels in the USA. *Soil Sci. Soc. Am. J.* **2001**, *65*, 391–402.
96. Oda, T.; Maksyutov, S. A very high-resolution (1 km × 1 km) global fossil fuel CO2 emission inventory derived using a point source database and satellite observations of nighttime lights. *Atmos. Chem. Phys.* **2011**, *11*, 543–556.
97. Owen, T.W. Using DMSP-OLS light frequency data to categorize urban environments associated with us climate observing stations. *Int. J. Remote Sens.* **1998**, *19*, 3451–3456.
98. Pandey, B.; Joshi, P.K.; Seto, K.C. Monitoring urbanization dynamics in india using DMSP/OLS night time lights and SPOT-VGT data. *Int. J. Appl. Earth Obs. Geoinf.* **2013**, *23*, 49–61.
99. Prasad, V.K.; Kant, Y.; Gupta, P.K.; Elvidge, C.; Badarinath, K.V.S. Biomass burning and related trace gas emissions from tropical dry deciduous forests of India: A study using DMSP-OLS data and ground-based measurements. *Int. J. Remote Sens.* **2002**, *23*, 2837–2851.
100. Propastin, P.; Kappas, M. Assessing satellite-observed nighttime lights for monitoring socioeconomic parameters in the republic of Kazakhstan. *GISci. Remote Sens.* **2012**, *49*, 538–557.
101. Raupach, M.R.; Rayner, P.J.; Paget, M. Regional variations in spatial structure of nightlights, population density and fossil-fuel CO2 emissions. *Energy Policy* **2010**, *38*, 4756–4764.
102. Roychowdhury, K.; Jones, S.D.; Arrowsmith, C.; Reinke, K. A comparison of high and low gain DMSP/OLS satellite images for the study of socio-economic metrics. *IEEE J. Sel. Top. Appl. Earth Obs. Remote Sens.* **2011**, *4*, 35–42.
103. Roychowdhury, P.K.; Maithani, S. Monitoring growth of built-up areas in indo-gangetic plain using multi-sensor remote sensing data. *J Indian Soc. Remote Sens.* **2010**, *38*, 291–300.
104. Roychowdhury, P.K.; Maithani, S.; Dadhwal, V.K. Estimation of urban population in indo-gangetic plains using night-time OLS data. *Int. J. Remote Sens.* **2012**, *33*, 2498–2515.
105. Small, C. Spatiotemporal dimensionality and time-space characterization of multitemporal imagery. *Remote Sens. Environ.* **2012**, *124*, 793–809.
106. Small, C.; Elvidge, C.D. Night on earth: Mapping decadal changes of anthropogenic night light in Asia. *Int. J. Appl. Earth Obs. Geoinf.* **2013**, *22*, 40–52.
107. Small, C.; Elvidge, C.D.; Balk, D.; Montgomery, M. Spatial scaling of stable night lights.
     *Remote Sens. Environ.* **2011**, *115*, 269–280.
108. Small, C.; Pozzi, F.; Elvidge, C.D. Spatial analysis of global urban extent from DMSP-OLS night lights. *Remote Sens. Environ.* **2005**, *96*, 277–291.
109. Steve, F.; Tom, M.; Karen, C.S.; Mark, A.F. A global fingerprint of macro-scale changes in urban structure from 1999 to 2009. *Environ. Res. Lett.* **2013**, *8*, 024004.
110. Stolle, F.; Dennis, R.A.; Kurniwan, I.; Lambin, E.F. Evaluation of remote sensing-based active fire datasets in Indonesia. *Int. J. Remote Sens.* **2004**, *25*, 471–479.
111. Sutton, P. Modeling population density with night-time satellite imagery and GIS.
     *Comput. Environ. Urban Syst.* **1997**, *21*, 227–244.
112. Sutton, P.; Roberts, D.; Elvidge, C.; Baugh, K. Census from heaven: An estimate of the global human population using nighttime satellite imagery. *Int. J. Remote Sens.* **2001**, *22*, 3061–3076.
113. Sutton, P.; Roberts, D.; Elvidge, C.; Melj, H. A comparison of nighttime satellite imagery and population density for the continental united states. *Photogramm. Eng. Remote Sens.* **1997**, *63*, 1303–1313.
114. Sutton, P.C. A scale-adjusted measure of “urban sprawl” using nighttime satellite imagery. *Remote Sens. Environ.* **2003**, *86*, 353–369.
115. Sutton, P.C.; Anderson, S.J.; Elvidge, C.D.; Tuttle, B.T.; Ghosh, T. Paving the planet: Impervious surface as proxy measure of the human ecological footprint. *Prog. Phys. Geogr.* **2009**, *33*, 510–527.
116. Sutton, P.C.; Costanza, R. Global estimates of market and non-market values derived from nighttime satellite imagery, land cover, and ecosystem service valuation. *Ecol. Econ.* **2002**, *41*, 509–527.
117. Sutton, P.C.; Cova, T.J.; Elvidge, C.D. Mapping “exurbia” in the vonterminous United States using nighttime satellite imagery. *Geocarto Int.* **2006**, *21*, 39–45.
118. Sutton, P.C.; Elvidge, C.; Obremski, T. Building and evaluating models to estimate ambient population density. *Photogramm. Eng. Remote Sens* **2003**, *69*, 545–553.
119. Sutton, P.C.; Goetz, A.R.; Fildes, S.; Forster, C.; Ghosh, T. Darkness on the edge of town: Mapping urban and peri-urban Australia using nighttime satellite imagery. *Prof. Geogr.* **2010**, *62*, 119–133.
120. Takahashi, K.I.; Terakado, R.; Nakamura, J.; Daigo, I.; Matsuno, Y.; Adachi, Y. In-Use stock of copper analysis using satellite nighttime light observation data. *Mater. Trans.* **2009**, *50*, 1871–1874.
121. Toenges-Schuller, N.; Stein, O.; Rohrer, F.; Wahner, A.; Richter, A.; Burrows, J.P.; Beirle, S.; Wagner, T.; Platt, U.; Elvidge, C.D. Global distribution pattern of anthropogenic nitrogen oxide emissions: Correlation analysis of satellite measurements and model calculations. *J. Geophys.* *Res.* **2006**, *111*, D05312.
122. Townsend, A.C.; Bruce, D.A. The use of night-time lights satellite imagery as a measure of australia’s regional electricity consumption and population distribution. *Int. J. Remote Sens.* **2010**, *31*, 4459–4480.
123. Tuttle, B.T.; Anderson, S.J.; Sutton, P.C.; Elvidge, C.D.; Baugh, K. It used to be dark here. *Photogramm. Eng. Remote Sens.* **2013**, *79*, 287–297.
124. Waluda, C.M.; Griffiths, H.J.; Rodhouse, P.G. Remotely sensed spatial dynamics of the Illex Argentinus fishery, southwest Atlantic. *Fish. Res.* **2008**, *91*, 196–202.
125. Waluda, C.M.; Yamashiro, C.; Elvidge, C.D.; Hobson, V.R.; Rodhouse, P.G. Quantifying light-fishing for Dosidicus Gigas in the eastern pacific using satellite remote sensing.
     *Remote Sens. Environ.* **2004**, *91*, 129–133.
126. Waluda, C.M.; Yamashiro, C.; Rodhouse, P.G., Influence of the Enso cycle on the light-fishery for Dosidicus Gigas in the Peru current: An analysis of remotely sensed data. *Fish. Res.* **2006**, *79*, 56–63.
127. Wang, W.; Cheng, H.; Zhang, L. Poverty assessment using DMSP/OLS night-time light satellite imagery at a provincial scale in China. *Adv. Space Res.* **2012**, *49*, 1253–1264.
128. Witmer, F.; O’Loughlin, J. Detecting the effects of wars in the Caucasus regions of Russia and Georgia using radiometrically normalized DMSP-OLS nighttime lights imagery. *GISci. Remote Sens.* **2011**, *48*, 478–500.
129. Wu, J.; He, S.; Peng, J.; Li, W.; Zhong, X. Intercalibration of DMSP-OLS night-time light data by the invariant region method. *Int. J. Remote Sens.* **2013**, *34*, 7356–7368.
130. Wu, J.; Wang, Z.; Li, W.; Peng, J. Exploring factors affecting the relationship between light consumption and GDP based on DMSP/OLS nighttime satellite imagery. *Remote Sens. Environ.* **2013**, *134*, 111–119.
131. Wu, K.; Yang, X. Urbanization and heterogeneous surface warming in eastern China.
     *Chin. Sci. Bull.* **2013**, *58*, 1363–1373.
132. Yang, X.; Yue, W.; Gao, D. Spatial improvement of human population distribution based on multi-sensor remote-sensing data: An input for exposure assessment. *Int. J. Remote Sens.* **2013**, *34*, 5569–5583.
133. Yang, Y.; He, C.; Zhang, Q.; Han, L.; Du, S. Timely and accurate national-scale mapping of urban land in China using defense meteorological satellite program’s operational linescan system nighttime stable light data. *J. Appl. Remote Sens.* **2013**, *7*, 073535–073535.
134. Zeng, C.; Zhou, Y.; Wang, S.; Yan, F.; Zhao, Q. Population spatialization in China based on night-time imagery and land use data. *Int. J. Remote Sens.* **2011**, *32*, 9599–9620.
135. Zhang, J.; Reid, J.S.; Miller, S.D.; Turk, F.J. Strategy for studying nocturnal aerosol optical depth using artificial lights. *Int. J. Remote Sens.* **2008**, *29*, 4599–4613.
136. Zhang, P.; Imhoff, M.L.; Wolfe, R.E.; Bounoua, L. Characterizing urban heat islands of global settlements using MODIS and nighttime lights products. *Can. J. Remote Sens.* **2010**, *36*, 185–196.
137. Zhang, Q.; Schaaf, C.; Seto, K.C. The vegetation adjusted NTL urban index: A new approach to reduce saturation and increase variation in nighttime luminosity. *Remote Sens. Environ.* **2013**, *129*, 32–41.
138. Zhang, Q.; Seto, K. Can night-time light data identify typologies of urbanization? A global assessment of successes and failures. *Remote Sens.* **2013**, *5*, 3476–3494.
139. Zhang, Q.; Seto, K.C. Mapping urbanization dynamics at regional and global scales using multi-temporal DMSP/OLS nighttime light data. *Remote Sens. Environ.* **2011**, *115*, 2320–2329.
140. Zhao, N.; Currit, N.; Samson, E. Net primary production and gross domestic product in China derived from satellite imagery. *Ecol. Econ.* **2011**, *70*, 921–928.
141. Zhao, N.; Ghosh, T.; Currit, N.; Elvidge, C. Relationships between satellite observed lit area and water footprints. *Water Resour. Manag.* **2011**, *25*, 2241–2250.
142. Zhao, N.; Ghosh, T.; Samson, E.L. Mapping spatio-temporal changes of Chinese electric power consumption using night-time imagery. *Int. J. Remote Sens.* **2012**, *33*, 6304–6320.
143. Zhao, N.; Samson, E.L. Estimation of virtual water contained in international trade products using nighttime imagery. *Int. J. Appl. Earth Obs. Geoinf.* **2012**, *18*, 243–250.
144. Zhuo, L.; Ichinose, T.; Zheng, J.; Chen, J.; Shi, P.J.; Li, X. Modelling the population density of China at the pixel level based on DMSP/OLS non-radiance-calibrated night-time light images.
     *Int. J. Remote Sens.* **2009**, *30*, 1003–1018.

© 2014 by the authors; licensee MDPI, Basel, Switzerland. This article is an open access article distributed under the terms and conditions of the Creative Commons Attribution license (http://creativecommons.org/licenses/by/3.0/).
